# Supplementary material
Source: PubMed Central journal article supplement (PMC7738397)
Supplement: NIHMS1638077-supplement-Supplemental_Material.pdf [file NIHMS1638077-supplement-Supplemental_Material.pdf]

# **Association of Sedentary Time and Incident Hospitalized Heart Failure in Postmenopausal Women**

Michael J. LaMonte, PhD, MPH, Joseph C. Larson, MS, JoAnn E. Manson, MD, DrPH, John Bellettiere, PhD, MPH, Cora E. Lewis, MD, MSPH, Jennifer W. Bea, PhD, Karen C. Johnson, MD, MPH, Andrea Z. LaCroix, PhD, Liviu Klein, MD, Corinna A. Noel, PhD, Marcia L. Stefanick, PhD, Jean Wactawski-Wende, PhD, Charles B. Eaton, MD, MS

## **SUPPLEMENTAL MATERIAL**

### **List of WHI Investigators**

**Supplemental Table I.** Baseline characteristics according to heart failure incidence.

**Supplemental Table II.** Associations between time-varying sitting time and heart failure incidence stratified on baseline subgroups.

## **Short List of WHI Investigators**

**Program Office:** (National Heart, Lung, and Blood Institute, Bethesda, Maryland)

Jacques Rossouw, Shari Ludlam, Dale Burwen, Joan McGowan, Leslie Ford, and Nancy Geller.

**Clinical Coordinating Center:** Clinical Coordinating Center: (Fred Hutchinson Cancer Research Center, Seattle, WA) Garnet Anderson, Ross Prentice, Andrea LaCroix, and Charles Kooperberg.

**Investigators and Academic Centers:** (Brigham and Women's Hospital, Harvard Medical School, Boston, MA) JoAnn E. Manson; (MedStar Health Research Institute/Howard University, Washington, DC) Barbara V. Howard; (Stanford Prevention Research Center, Stanford, CA) Marcia L. Stefanick; (The Ohio State University, Columbus, OH) Rebecca Jackson; (University of Arizona, Tucson/Phoenix, AZ) Cynthia A. Thomson; (University at Buffalo, Buffalo, NY) Jean Wactawski-Wende; (University of Florida, Gainesville/Jacksonville, FL) Marian Limacher; (University of Iowa, Iowa City/Davenport, IA) Robert Wallace; (University of Pittsburgh, Pittsburgh, PA) Lewis Kuller; (Wake Forest University School of Medicine, Winston-Salem, NC) Sally Shumaker.

**Women's Health Initiative Memory Study:** (Wake Forest University) Sally Shumaker.

**For a full list of all the investigators** who have contributed to WHI science, please visit:

<https://www.whi.org/researchers/Documents%20%20Write%20a%20Paper/WHI%20Investigator%20Long%20List.pdf>

**Supplemental Table I.** Baseline characteristics according to heart failure incidence. (Data are mean  $\pm$ SD, or %).

| Characteristic                     | Incident Heart Failure |                       | P-value*           | Age-standardized HF Rate <sup>†</sup> |
|------------------------------------|------------------------|-----------------------|--------------------|---------------------------------------|
|                                    | Case<br>(n=1,402)      | Noncase<br>(n=79,580) |                    |                                       |
| Age, years                         | 68.7 $\pm$ 6.6         | 63.3 $\pm$ 7.3        | <.001              |                                       |
| 50-59                              | 10.8                   | 33.1                  |                    | 0.69                                  |
| 60-69                              | 38.3                   | 44.4                  |                    | 1.91                                  |
| 70-79                              | 50.9                   | 22.5                  |                    | 5.08                                  |
| Race-ethnicity                     |                        |                       | <.001 <sup>‡</sup> |                                       |
| White                              | 89.2                   | 84.9                  |                    | 2.34                                  |
| African American                   | 6.9                    | 7.1                   |                    | 2.52                                  |
| Hispanic                           | 1.4                    | 3.4                   |                    | 1.40                                  |
| Native American                    | 0.5                    | 0.4                   |                    | 3.97                                  |
| Asian / Pacific Islander           | 0.9                    | 3.0                   |                    | 0.68                                  |
| Unknown                            | 1.1                    | 1.3                   |                    | 2.04                                  |
| Education                          |                        |                       | <.001              |                                       |
| High school or less                | 24.8                   | 19.6                  |                    | 2.69                                  |
| Some college                       | 40.1                   | 36.0                  |                    | 2.48                                  |
| College graduate                   | 34.7                   | 43.6                  |                    | 1.95                                  |
| Household income                   |                        |                       | <.001              |                                       |
| <\$20,000                          | 23.9                   | 12.6                  |                    | 3.54                                  |
| \$20,000-49,000                    | 44.9                   | 40.3                  |                    | 2.35                                  |
| \$50,000-74,999                    | 14.0                   | 19.7                  |                    | 1.81                                  |
| $\geq$ \$75,000                    | 10.0                   | 20.4                  |                    | 1.71                                  |
| Smoking                            |                        |                       | <.001              |                                       |
| Never                              | 46.7                   | 50.7                  |                    | 2.03                                  |
| Past                               | 42.2                   | 42.5                  |                    | 2.35                                  |
| Current                            | 9.3                    | 5.8                   |                    | 4.53                                  |
| Alcohol Use                        |                        |                       | <0.001             |                                       |
| Never                              | 12.6                   | 10.3                  |                    | 2.57                                  |
| Past                               | 22.2                   | 17.2                  |                    | 2.88                                  |
| Current                            | 64.9                   | 72.0                  |                    | 2.12                                  |
| Hormone therapy use                |                        |                       | <0.001             |                                       |
| Never                              | 50.2                   | 39.3                  |                    | 2.68                                  |
| Past                               | 17.3                   | 14.6                  |                    | 2.31                                  |
| Current                            | 32.5                   | 46.1                  |                    | 1.90                                  |
| BMI, kg/m <sup>2</sup>             | 28.3 $\pm$ 6.4         | 26.8 $\pm$ 5.4        | <.001              |                                       |
| < 18.5                             | 1.8                    | 1.2                   |                    | 3.28                                  |
| 18.5 - <25.0                       | 32.8                   | 42.1                  |                    | 1.77                                  |
| 25.0 - <30.0                       | 32.5                   | 34.6                  |                    | 2.09                                  |
| $\geq$ 30.0                        | 33.0                   | 22.1                  |                    | 3.63                                  |
| Total physical activity, MET-hr/wk | 11.5 $\pm$ 12.1        | 14.5 $\pm$ 14.5       | <0.001             |                                       |
| 0                                  | 14.9                   | 11.4                  |                    | 3.10                                  |
| >0 - 7.4                           | 32.0                   | 27.0                  |                    | 2.70                                  |
| $\geq$ 7.5                         | 53.1                   | 61.6                  |                    | 1.96                                  |
| ADL score                          | 4.0 $\pm$ 0.4          | 4.0 $\pm$ 0.3         | .02                |                                       |

|                             |              |              |        |       |
|-----------------------------|--------------|--------------|--------|-------|
| Physical function score     | 75.6 ± 17.1  | 85.6 ± 14.5  | <.001  |       |
| Systolic BP, mmHg           | 136.0 ± 19.9 | 126.2 ± 17.7 | <.001  |       |
| Diastolic BP, mmHg          | 73.9 ± 10.6  | 74.7 9.3     | .003   |       |
| History of:<br>Hysterectomy |              |              | <0.001 |       |
| Yes                         | 46.7         | 40.7         |        | 2.55  |
| No                          | 53.3         | 59.3         |        | 2.11  |
| Diabetes <sup>§</sup>       |              |              | <0.001 |       |
| Yes                         | 13.9         | 3.0          |        | 10.09 |
| No                          | 85.7         | 96.9         |        | 2.03  |
| Hypertension <sup>§</sup>   |              |              | <0.001 |       |
| Yes                         | 65.7         | 38.4         |        | 3.46  |
| No                          | 33.7         | 61.1         |        | 1.43  |
| CHD                         |              |              | <0.001 |       |
| Yes                         | 12.1         | 2.4          |        | 9.05  |
| No                          | 86.2         | 96.3         |        | 2.07  |
| Stroke                      |              |              | <0.001 |       |
| Yes                         | 3.5          | 1.1          |        | 6.57  |
| No                          | 96.4         | 98.9         |        | 2.24  |
| Atrial fibrillation         |              |              | <0.001 |       |
| Yes                         | 12.8         | 3.9          |        | 6.01  |
| No                          | 85.2         | 94.8         |        | 2.09  |

\* P-value computed from a linear (continuous) or logistic (dichotomous) model with the demographic variable as a function of heart failure event status.

†Rate (HF cases per 1,000 person-years) standardized to the overall WHIOS enrollment age distribution (50-59, 60-69, 70-79 years).

‡Comparing percentage of whites versus nonwhites.

§History of physician-diagnosis and treatment using medication.

Physical function score ranges from 0-100; higher scores reflect better functional status.

ADL, activities of daily living score ranges from 4-12; lower values reflect greater independence.

BMI, body mass index.

BP, blood pressure.

CHD, coronary heart disease (myocardial infarction, coronary revascularization procedures).

MET-hr/wk, metabolic equivalent hours per week.

**Supplemental Table II.** Associations between time-varying sitting time and heart failure incidence stratified on baseline subgroups.

| Subgroup                            | N      | Cases | Rate* | Sitting Time (hr/d) |                   |                   | Interaction |
|-------------------------------------|--------|-------|-------|---------------------|-------------------|-------------------|-------------|
|                                     |        |       |       | ≤4.5                | 4.6-8.5           | >8.5              | P-value     |
| <b>Age, yr</b>                      |        |       |       |                     |                   |                   | .94         |
| 50-64                               | 44,381 | 331   | 0.92  | 1.00 (ref)          | 1.03 (0.79, 1.33) | 1.32 (1.01, 1.74) |             |
| 65-79                               | 36,601 | 1,071 | 3.81  | 1.00 (ref)          | 1.10 (0.96, 1.26) | 1.32 (1.12, 1.57) |             |
| <b>Race-ethnicity<sup>†</sup></b>   |        |       |       |                     |                   |                   | .08         |
| White                               | 68,787 | 1,250 | 2.27  | 1.00 (ref)          | 1.08 (0.95, 1.23) | 1.39 (1.20, 1.62) |             |
| Black                               | 5,738  | 97    | 2.23  | 1.00 (ref)          | 1.29 (0.83, 2.00) | 1.19 (0.67, 2.09) |             |
| <b>BMI, kg/m<sup>2</sup></b>        |        |       |       |                     |                   |                   | .11         |
| <30                                 | 62,905 | 940   | 1.87  | 1.00 (ref)          | 1.13 (0.98, 1.31) | 1.47 (1.23, 1.76) |             |
| ≥30                                 | 18,077 | 462   | 3.29  | 1.00 (ref)          | 0.98 (0.79, 1.21) | 1.14 (0.90, 1.45) |             |
| <b>Diabetes<sup>‡</sup></b>         |        |       |       |                     |                   |                   | .71         |
| Present                             | 2,612  | 195   | 10.29 | 1.00 (ref)          | 1.31 (0.94, 1.83) | 1.30 (0.89, 1.91) |             |
| Absent                              | 78,285 | 1,202 | 1.93  | 1.00 (ref)          | 1.05 (0.92, 1.19) | 1.35 (1.15, 1.57) |             |
| <b>Hypertension<sup>‡</sup></b>     |        |       |       |                     |                   |                   | .11         |
| Present                             | 22,219 | 719   | 4.22  | 1.00 (ref)          | 1.17 (0.99, 1.39) | 1.51 (1.23, 1.84) |             |
| Absent                              | 58,140 | 670   | 1.43  | 1.00 (ref)          | 0.98 (0.83, 1.16) | 1.18 (0.96, 1.46) |             |
| <b>History of CHD<sup>§</sup></b>   |        |       |       |                     |                   |                   | .99         |
| Present                             | 22,219 | 170   | 11.30 | 1.00 (ref)          | 1.10 (0.77, 1.56) | 1.34 (0.90, 2.01) |             |
| Absent                              | 58,140 | 1,209 | 1.95  | 1.00 (ref)          | 1.09 (0.95, 1.24) | 1.34 (1.15, 1.57) |             |
| <b>Physical function</b>            |        |       |       |                     |                   |                   | .46         |
| <70                                 | 10196  | 422   | 5.50  | 1.00 (ref)          | 1.13 (0.90, 1.42) | 1.32 (1.02, 1.71) |             |
| 70-89                               | 24329  | 546   | 2.87  | 1.00 (ref)          | 1.06 (0.88, 1.29) | 1.42 (1.13, 1.78) |             |
| ≥90                                 | 45695  | 417   | 1.13  | 1.00 (ref)          | 1.01 (0.81, 1.24) | 1.11 (0.84, 1.46) |             |
| <b>Physical activity, MET-hr/wk</b> |        |       |       |                     |                   |                   | .65         |
| 0                                   | 9,293  | 209   | 2.89  | 1.00 (ref)          | 1.11 (0.80, 1.55) | 1.36 (0.95, 1.94) |             |
| >0-7.4                              | 21,916 | 449   | 2.61  | 1.00 (ref)          | 1.04 (0.84, 1.29) | 1.22 (0.95, 1.57) |             |
| ≥7.5                                | 49,773 | 744   | 1.87  | 1.00 (ref)          | 1.09 (0.93, 1.29) | 1.42 (1.16, 1.73) |             |

Data are hazard ratio (95% confidence interval). BMI, body mass index; CHD, coronary heart disease; MET-hr/wk, metabolic equivalent hours per week.

Hazard ratios from models of heart failure as a function of categorical sedentary time, the subgroup of interest, their interaction, and are adjusted for Model 4 covariates in Table 2.

\*Crude rate, cases per 1,000 person-years.

†Insufficient data for meaningful stratification on other race-ethnic groups.

‡History of physician-diagnosis and treatment using medication.

§Not adjusted for time-varying CHD.

BMI, body mass index.

CHD, coronary heart disease (myocardial infarction, coronary revascularization procedures).

MET-hr/wk, metabolic equivalent hours per week.
